# Supplementary material
Source: PubMed Central journal article supplement (PMC6719252)
Supplement: Supplementary_Data.pdf [file Supplementary_Data.pdf]

Table SI. Background of six patients with CRC subjected to microRNA array analysis.

| Characteristics  | CRC patients |          |          |          |          |          |
|------------------|--------------|----------|----------|----------|----------|----------|
|                  | 1            | 2        | 3        | 4        | 5        | 6        |
| Age/race         | 65/Jpn       | 61/Jpn   | 67/Jpn   | 67/Jpn   | 61/Jpn   | 72/Jpn   |
| Sex              | M            | M        | F        | M        | M        | F        |
| Location         | Rectal       | Rectal   | Rectal   | Rectal   | Rectal   | Rectal   |
| Metastatic sites | >1           | >1       | >1       | >1       | >1       | >1       |
| KRAS             | Mutation     | Mutation | Mutation | Mutation | Mutation | Mutation |
| TNM stage        | IV           | IV       | IV       | IV       | IV       | IV       |
| RECIST           | SD           | SD       | SD       | PD       | PD       | PD       |
| Clinical outcome | Survival     | Survival | Survival | Death    | Death    | Death    |

Jpn, Japanese; M, Male; F, Female; Por, Poorly differentiated; Mod, Moderately differentiated; RECIST, Response Evaluation Criteria in Solid Tumors; SD, Stable Disease; PD, Progressive Disease; CRC, colorectal cancer.

Table SII. Background of three healthy volunteers subjected to microRNA array analysis.

| Characteristics | Healthy volunteers |        |        |
|-----------------|--------------------|--------|--------|
|                 | 1                  | 2      | 3      |
| Age/race        | 65/Jpn             | 61/Jpn | 70/Jpn |
| Sex             | M                  | M      | F      |

M, Male; F, Female; Jpn, Japanese; Por, Poorly differentiated; Mod, Moderately differentiated.
